# Supplementary material
Source: Springer Nature journal article supplement (https://www.springermedizin.de/resource/supplementary/12906_2011_533_MOESM2_ESM.pdf/9520258)

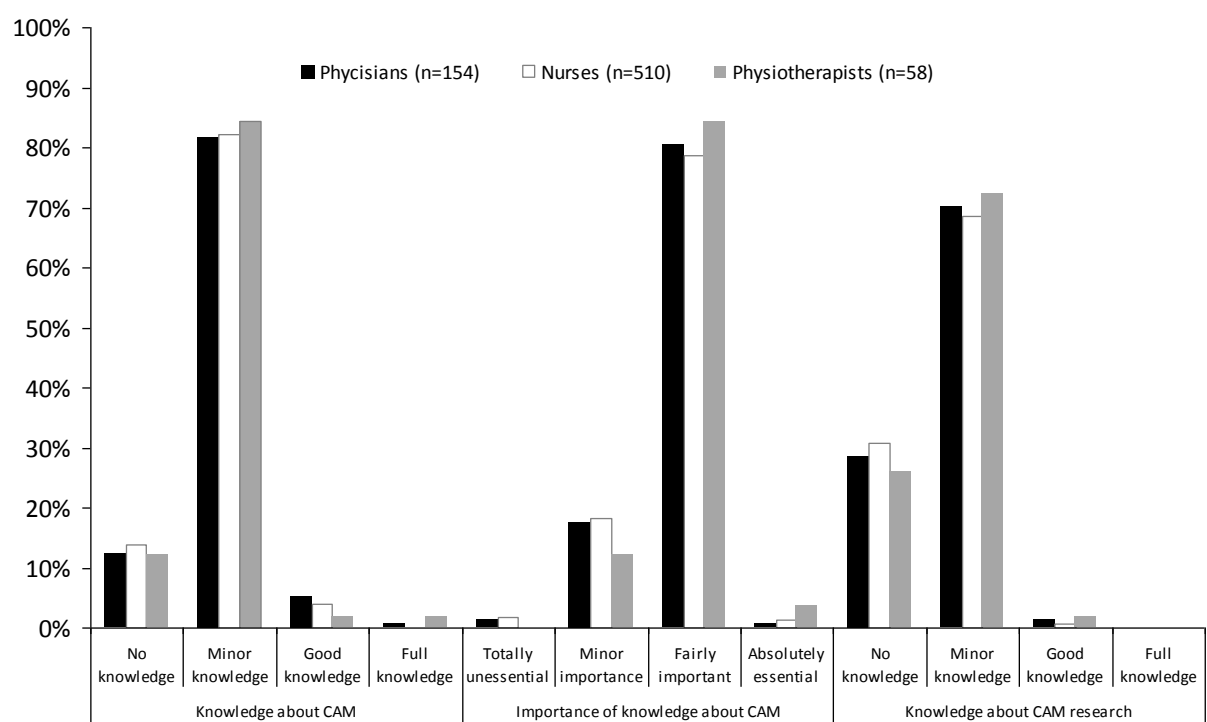

Supplement: MOESM2 [file 9520258]
